# Supplementary material for: Assessment of Metagenomic Sequencing and qPCR for Detection of Influenza D Virus in Bovine Respiratory Tract Samples
Source: PubMed Central journal article supplement (PMC7472010; doi:10.3390/v12080814), 2020-07-28
Supplement: viruses-12-00814-s001.pdf [file viruses-12-00814-s001.pdf]

**Supplementary Table 1.** Summary of viruses detected by Nanopore and MiSeq sequencing.

| Sample* | MiSeq             | Nanopore (In-house) | Nanopore (WIMP)        |
|---------|-------------------|---------------------|------------------------|
| 6       | IDV               | IDV                 | IDV                    |
| 10      | BRSV, BRBV, IDV   | BRSV, BRBV, IDV     | BRSV, BRBV, IDV        |
| 32      | BNV               | BNV                 | BNV                    |
| 50      | BRBV, IDV         | BRBV, IDV           | BRBV, IDV              |
| 69      | IDV               | IDV                 | IDV                    |
| 129     | BRBV, IDV         | BRBV, IDV           | BRBV, IDV              |
| 170     | IDV               | IDV                 | IDV                    |
| 199     | BRSV, IDV, UBPV6  | BRSV, IDV, BPIV3    | BRSV, IDV, UBPV6       |
| T10     | BRSV, IDV         | BRSV                | BRSV, IDV              |
| 13      | IDV               | IDV                 | BRSV, BRBV, IDV        |
| T52     | BRBV, IDV         | IDV                 | BNV, IDV               |
| 42      | BCV, IDV          | BCV, IDV, BRSV      | BCV, IDV, BRSV, BNV    |
| 114     | BRBV, UTPV1       | ND                  | BRSV, BRBV, IDV, UTPV1 |
| T30     | BRBV, IDV         | BRBV                | BRBV, IDV, BNV         |
| T129    | BAV, IDV          | BAV, IDV            | BAV, IDV, BNV          |
| 260     | EVE, UTPV1, UBPV6 | ND                  | BRSV, BRBV, IDV        |
| 70      | BRAV              | ND                  | BRSV, BRBV, IDV        |
| 135     | BNV               | ND                  | BRSV, BRBV, IDV        |
| T50     | ND                | ND                  | BNV, IDV               |

BCV: bovine coronavirus; IDV: influenza D virus; BRBV: bovine rhinitis B virus; BRAV: bovine rhinitis A virus; BRSV: bovine respiratory syncytial virus; BPIV3: bovine parainfluenza virus 3; EVE: enterovirus E; UTPV1: ungulate tetraparvovirus 1; UBPV6: ungulate bocaparvovirus 6; BNV: bovine nidovirus; BAV: bovine astrovirus; \*Samples beginning with T are tracheal, all others are nasal swabs, ND – not detected. WIMP – What’s in my pot.
